# Supplementary material for: Toxic Organic Contaminants in Airborne Particles: Levels, Potential Sources and Risk Assessment
Source: MDPI journal article supplement (doi:10.3390/ijerph18084352), 2021-04-20
Supplement: s1 [file s1]

Table S1. Organic compound list and codes used in PCA development

|            | <i>Compound</i>                              | <i>PCA code</i> |                     |
|------------|----------------------------------------------|-----------------|---------------------|
| PAHs       | Anthracene                                   | P1              |                     |
|            | Fluoranthene                                 | P2              |                     |
|            | Pyrene                                       | P3              |                     |
|            | Benz[a]anthracene                            | P4              |                     |
|            | Chrysene +Trif                               | P5              |                     |
|            | Benz[k]fluoranthene                          | P6              |                     |
|            | Benz[b]fluoranthene                          | P7              |                     |
|            | Benz[a]fluoranthene                          | P8              |                     |
|            | Benz[e]pyrene                                | P9              |                     |
|            | Benz[a]pyrene                                | P10             |                     |
|            | Benz[ghi]perylene                            | P11             |                     |
|            | Indeno[1,2,3-cd]pyrene                       | P12             |                     |
|            | Coronene                                     | P13             |                     |
| Oxy-PAHs   | 9-Fluorenone                                 | O1              |                     |
|            | 1,8-Naphthalic anhydride                     | O2              |                     |
|            | 4H-Cyclopenta[def]phenanthrene-4-one         | O3              |                     |
|            | 1,4-Phenanthrenedione                        | O4              |                     |
|            | 9,10-Anthracene-dione                        | O5              |                     |
|            | 9,10-Phenanthrenequinone                     | O6              |                     |
|            | Benz[a]fluorenone                            | O7              |                     |
|            | 1,9-Benz-10-anthrone                         | O8              |                     |
|            | Benzo[a]anthracene-7,12-dione                | O9              |                     |
| Nitro-PAHs | 2-N-Fluorene                                 | N1              |                     |
|            | 2-N-Anthracene                               | N2              |                     |
|            | 2-N-Phenanthrene                             | N3              |                     |
|            | 3-N- Phenanthrene                            | N4              |                     |
|            | 9-N- Anthracene                              | N5              |                     |
|            | 9-N- Phenanthrene                            | N6              |                     |
|            | 2-N-Fluoranthene                             | N7              |                     |
|            | 1-N-Pyrene                                   | N8              |                     |
|            | 3-N-Fluoranthene                             | N9              |                     |
|            | 7-N-benz[a]anthracene                        | N10             |                     |
|            |                                              |                 | <i>Abbreviation</i> |
| PCBs       | 2,4,4'-Trichlorobiphenyl                     | PB28            | PCB28               |
|            | 2,3,3',4,4'-Pentachlorobiphenyl              | PB105           | PCB105              |
|            | 3,3',4,4',5-Pentachlorobiphenyl              | PB126           | PCB126              |
|            | 2,2',3,4,4',5'-Hexachlorobiphenyl            | PB138           | PCB138              |
|            | 2,2',3,4',5,5'-Hexachlorobiphenyl            | PB146           | PCB146              |
|            | 2,2',3,5,5',6-Hexachlorobiphenyl             | PB151           | PCB151              |
|            | 2,3,3',4,4',5-Hexachlorobiphenyl             | PB156           | PCB156              |
|            | 2,3,3',4,4',5'-Hexachlorobiphenyl            | PB157           | PCB157              |
|            | 2,3',4,4',5,5'-Hexachlorobiphenyl            | PB167           | PCB167              |
|            | 3,3',4,4',5,5'-Hexachlorobiphenyl            | PB169           | PCB169              |
|            | 2,2',3,3',4,4',5-Heptachlorobiphenyl         | PB170           | PCB170              |
|            | 2,2',3,3',4',5,6-Heptachlorobiphenyl         | PB177           | PCB177              |
|            | 2,2',3,4,4',5',6-Heptachlorobiphenyl         | PB183           | PCB183              |
|            | 2,2',3,4',5,5',6-Heptachlorobiphenyl         | PB187           | PCB187              |
|            | 2,3,3',4,4',5,6-Heptachlorobiphenyl          | PB190           | PCB190              |
| PBDEs      | 2,4,4'-Tribromodiphenyl ether                | B28             | BDE28               |
|            | 2,2',4,4'-Tetrabromodiphenyl ether           | B47             | BDE47               |
|            | 2,2',4,5'-Tetrabromodiphenyl ether           | B49             | BDE49               |
|            | 2,2',4,4',5-Pentabromodiphenyl ether         | B99             | BDE99               |
|            | 2,2',4,4',6-Pentabromodiphenyl ether         | B100            | BDE100              |
|            | 2,2',4,4',5,5'-Hexabromodiphenyl ether       | B153            | BDE153              |
|            | 2,2',3,4,4',5',6-Heptabromodiphenyl ether    | B183            | BDE183              |
| NBFRs      | 2,4-Dibromophenol                            | NB1             | 2,4-DBP             |
|            | 2,6-Dibromophenol                            | NB2             | 2,6-DBP             |
|            | 2,4,6-Tribromophenol                         | NB3             | TBP                 |
|            | Allyl-2,4,6-tribromophenyl ether             | NB4             | ATE                 |
|            | 1,2-dibromo-4-(1,2-dibromoethyl) cyclohexane | NB5             | TBECH               |

|                                                |      |       |
|------------------------------------------------|------|-------|
| 2,3,4,5,6-pentabromoethylbenzene               | NB6  | PBEB  |
| 2,3-dibromopropyl-2, 4, 6-tribromophenylether  | NB7  | DPTE  |
| Hexabromobenzene                               | NB8  | HBB   |
| 2-Ethylhexyl-2,3,4,5-tetrabrombenzoate         | NB9  | TBB   |
| 1,2-bis(2,4,6-tribromophenoxy) ethane          | NB10 | BTBPE |
| bis (2-ethylhexyl)-3,4,5,6-tetrabromophthalate | NB11 | TBPH  |

Table S2. PAH parameters for carcinogenic risk assessment

|      | <i>Compound</i>        | <i>DET (h)<sup>a</sup></i> | <i>EF (d)</i> | <i>ED(y)</i> | <i>AT (y)</i> | <i>IUR (µg/m<sup>3</sup>)<sup>1,2</sup></i> |
|------|------------------------|----------------------------|---------------|--------------|---------------|---------------------------------------------|
| PAHs | Anthracene             | 8                          | 350           | 30           | 70            | 1,10E-05                                    |
|      | Fluoranthene           | 8                          | 350           | 30           | 70            | 1,10E-06                                    |
|      | Pyrene                 | 8                          | 350           | 30           | 70            | 1,10E-06                                    |
|      | Benz[a]anthracene      | 8                          | 350           | 30           | 70            | 1,10E-04                                    |
|      | Chrysene +Trif         | 8                          | 350           | 30           | 70            | 1,10E-05                                    |
|      | Benz[b]fluoranthene    | 8                          | 350           | 30           | 70            | 1,10E-04                                    |
|      | Benz[a]fluoranthene    | 8                          | 350           | 30           | 70            | 1,10E-04 <sup>b</sup>                       |
|      | Benz[e]pyrene          | 8                          | 350           | 30           | 70            | 1,10E-03 <sup>c</sup>                       |
|      | Benz[a]pyrene          | 8                          | 350           | 30           | 70            | 1,10E-03                                    |
|      | Indeno[1,2,3-cd]pyrene | 8                          | 350           | 30           | 70            | 1,10E-04                                    |
|      | Benz[ghi]perylene      | 8                          | 350           | 30           | 70            | 1,10E-05                                    |

<sup>a</sup> Daily working hours; <sup>b</sup> Benz[b]fluoranthene value (see par. 2.3); <sup>c</sup> Benz[a]pyrene value (see par. 2.3)

Table S3. Oxy-PAH parameters for carcinogenic risk assessment

|          | <i>Compound</i>                      | <i>DET (h)</i> | <i>EF (d)</i> | <i>ED(y)</i> | <i>AT (y)</i> | <i>IUR (µg/m<sup>3</sup>)<sup>3</sup></i> |
|----------|--------------------------------------|----------------|---------------|--------------|---------------|-------------------------------------------|
| Oxy-PAHs | 9-Fluorenone                         | 8              | 350           | 30           | 70            | 8,70E-05                                  |
|          | 1,8-Naphthalic anhydride             | 8              | 350           | 30           | 70            | 8,70E-05                                  |
|          | 4H-Cyclopenta[def]phenanthrene-4-one | 8              | 350           | 30           | 70            | 8,70E-05                                  |
|          | 1,4-Phenanthrenedione                | 8              | 350           | 30           | 70            | 8,70E-05                                  |
|          | 9,10-Anthracene-dione                | 8              | 350           | 30           | 70            | 8,70E-05                                  |
|          | 9,10-Phenanthrenequinone             | 8              | 350           | 30           | 70            | 8,70E-05                                  |
|          | Benz[a]fluorenone                    | 8              | 350           | 30           | 70            | 8,70E-05                                  |
|          | 1,9-Benz-10-anthrone                 | 8              | 350           | 30           | 70            | 8,70E-05                                  |
|          | Benzo[a]anthracene-7,12-dione        | 8              | 350           | 30           | 70            | 8,70E-05                                  |

Table S4. Nitro-PAH parameters for carcinogenic risk assessment

|            | <i>Compound</i>       | <i>DET (h)</i> | <i>EF (d)</i> | <i>ED(y)</i> | <i>AT (y)</i> | <i>IUR (µg/m<sup>3</sup>)<sup>3</sup></i> |
|------------|-----------------------|----------------|---------------|--------------|---------------|-------------------------------------------|
| Nitro-PAHs | 2-N-Fluorene          | 8              | 350           | 30           | 70            | 8,70E-05                                  |
|            | 2-N-Anthracene        | 8              | 350           | 30           | 70            | 8,70E-05                                  |
|            | 2-N-Phenanthrene      | 8              | 350           | 30           | 70            | 8,70E-05                                  |
|            | 3-N- Phenanthrene     | 8              | 350           | 30           | 70            | 8,70E-05                                  |
|            | 9-N- Anthracene       | 8              | 350           | 30           | 70            | 8,70E-05                                  |
|            | 9-N- Phenanthrene     | 8              | 350           | 30           | 70            | 8,70E-05                                  |
|            | 2-N-Fluoranthene      | 8              | 350           | 30           | 70            | 8,70E-05                                  |
|            | 1-N-Pyrene            | 8              | 350           | 30           | 70            | 8,70E-05                                  |
|            | 3-N-Fluoranthene      | 8              | 350           | 30           | 70            | 8,70E-05                                  |
|            | 7-N-benz[a]anthracene | 8              | 350           | 30           | 70            | 8,70E-05                                  |

Table S5. PCB parameters for carcinogenic risk assessment

|      | <i>Compound</i> | <i>DET (h)</i> | <i>EF (d)</i> | <i>ED(y)</i> | <i>AT (y)</i> | <i>IUR (µg/m³)<sup>d</sup></i> |
|------|-----------------|----------------|---------------|--------------|---------------|--------------------------------|
| PCBs | PB105           | 8              | 350           | 30           | 70            | 1,10E-03                       |
|      | PB126           | 8              | 350           | 30           | 70            | 3,80E+00                       |
|      | PB156           | 8              | 350           | 30           | 70            | 1,10E-03                       |
|      | PB157           | 8              | 350           | 30           | 70            | 1,10E-03                       |
|      | PB167           | 8              | 350           | 30           | 70            | 1,10E-03                       |
|      | PB169           | 8              | 350           | 30           | 70            | 1,10E+00                       |
|      | PB187           | 8              | 350           | 30           | 70            | 1,10E-03                       |

Table S6. PBDE parameters for non-carcinogenic risk assessment

|       | <i>Compound</i>     | <i>DET (h)</i> | <i>EF (d)</i> | <i>ED(y)</i> | <i>AT (y)</i> | <i>RFC (µg/m³)<sup>e</sup></i> |
|-------|---------------------|----------------|---------------|--------------|---------------|--------------------------------|
| PBDEs | BDE28               | 8              | 350           | 30           | 25            | 1,10E-02 <sup>d</sup>          |
|       | BDE47               | 8              | 350           | 30           | 25            | 1,10E-02 <sup>d</sup>          |
|       | BDE49               | 8              | 350           | 30           | 25            | 1,10E-02 <sup>d</sup>          |
|       | BDE99 <sup>e</sup>  | 8              | 350           | 30           | 25            | 7,00E-03                       |
|       | BDE100 <sup>e</sup> | 8              | 350           | 30           | 25            | 7,00E-03                       |
|       | BDE153              | 8              | 350           | 30           | 25            | 7,00E-03                       |
|       | BDE183              | 8              | 350           | 30           | 25            | 1,10E-02 <sup>d</sup>          |

<sup>d</sup> as a precautionary approach, the highest value associated with PBDEs was chosen (see par. 4.4)

Table S7. NBFR parameters non carcinogenic risk assessment

|       | <i>Compound</i> | <i>DET (h)</i> | <i>EF (d)</i> | <i>ED(y)</i> | <i>AT (y)</i> | <i>RFC (µg/m³)<sup>e</sup></i> |
|-------|-----------------|----------------|---------------|--------------|---------------|--------------------------------|
| NBFRs | HBCD            | 8              | 350           | 30           | 25            | 1,10E-02                       |
|       | TBB             | 8              | 350           | 30           | 25            | 1,10E-02                       |
|       | TBCO            | 8              | 350           | 30           | 25            | 1,10E-02                       |
|       | TBPH            | 8              | 350           | 30           | 25            | 1,10E-02                       |

<sup>e</sup> as a precautionary approach, the highest value associated with PBDEs was chosen (see par. 4.4)

1. EPA (2003) Integrated risk information system. <http://www.epa.gov/iris>. Accessed 16 June 2010
2. OEHHA, 2002, 2005. Air Toxics Hot Spots Program Risk Assessment Guidelines. Part II: Technical Support Document for Describing Available Cancer Potency Factors. Office of Environmental Health Hazard Assessment. Available from: [http://www.oehha.ca.gov/air/hot\\_spots/pdf/TSDNov2002.pdf](http://www.oehha.ca.gov/air/hot_spots/pdf/TSDNov2002.pdf) (p. 109) and [http://www.oehha.ca.gov/air/hot\\_spots/pdf/May2005Hotspots.pdf](http://www.oehha.ca.gov/air/hot_spots/pdf/May2005Hotspots.pdf) (p. 8 and A-1).
3. WHO. Air quality guidelines for Europe. Copenhagen, Denmark:WHO Regional Office for Europe; 2000 [http://www.euro.who.int/\\_\\_data/assets/pdf\\_file/0005/74732/E71922.pdf](http://www.euro.who.int/__data/assets/pdf_file/0005/74732/E71922.pdf) accessed March 19, 2013].
4. OEHHA. 2011. Office of Environmental Health Hazard Assessment (OEHHA). Appendix A: Hot Spots Unit Risk and Cancer Potency Values Updated October 2020. <https://oehha.ca.gov/media/downloads/cmr/appendixa.pdf>
5. EPA Region 9, 2019. Toxicity and chemical/physical properties for Regional Screening level (RSL) of Chemical Contaminants at Superfund Sites. [Online] <http://www.epa.gov/region9/superfund/prg/>. US Environmental Protection Agency.
6. INAIL (2020) PBDE Monograph. [Online] <https://www.inail.it/cs/internet/docs/alg-pubbl-polibromodifenileteri-pbde-microinquinanti-organici.pdf>. Italian Workers' Compensation Authority.
